# Supplementary material
Source: PubMed Central journal article supplement (PMC3514474)
Supplement: NIHMS34304-supplement-1.pdf [file NIHMS34304-supplement-1.pdf]

Nasarre et al.  
Supplementary Fig. 1

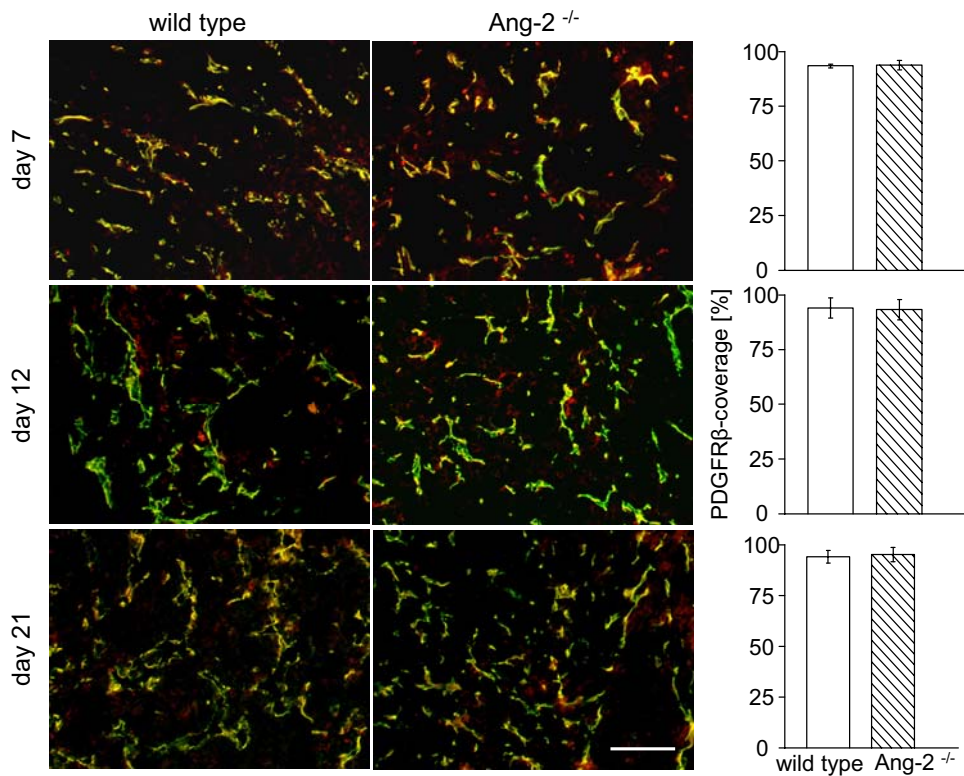

**Supplementary Fig. 1: Analysis of PDGFR- $\beta$  staining in different stage Lewis lung carcinomas grown in wild type and in Ang-2-deficient mice.** Tumors were harvested 7 days (top), 12 days (middle) or 21 days (bottom) after tumor inoculation. Tumor sections were double-stained for the endothelial cell marker CD31 (green) and for the mural cell marker PDGFR-  $\beta$ . Vessel coverage was calculated as the percentage of PDGFR- $\beta$ -positive vessels compared to the number of CD31-positive vessels. CD31 and PDGFR- $\beta$  co-localized in >90% of all analyzed samples. High power analysis revealed that CD31 staining and PDGFR- $\beta$  staining could clearly be separated in some vessels, whereas it distinctly co-localized in many tumor microvessels. Co-localization of both markers was consequently interpreted to reflect PDGFR- $\beta$  expression by angiogenic endothelial cells rather than *bona fide* mural cell staining. PDGFR- $\beta$  was therefore considered a questionable mural cell marker and excluded from all further analysis.

Nasarre et al.  
Supplementary Fig. 2

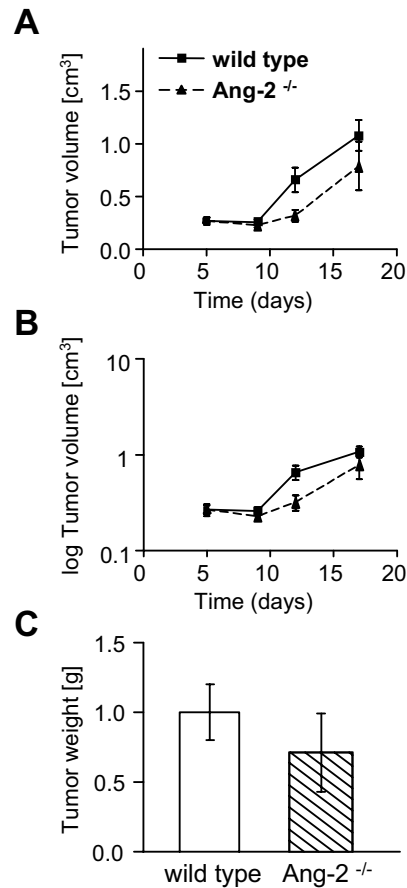

**Supplementary Fig. 2: Growth of B16F10 melanoma in wild type and in Ang-2-deficient mice.** Tumor growth dissociated during early tumor growth when the tumors had grown to 0.2-0.4 cm<sup>3</sup> (**A**). At later time points tumor growth rates were similar in wild type and in Ang-2-deficient mice as evidenced by parallel or even converging growth curves of log transformed tumor volume data (**B**). Total tumor weight was reduced in Ang-2-deficient mice, albeit not significantly (**C**).

Nasarre et al.  
Supplementary Fig. 3

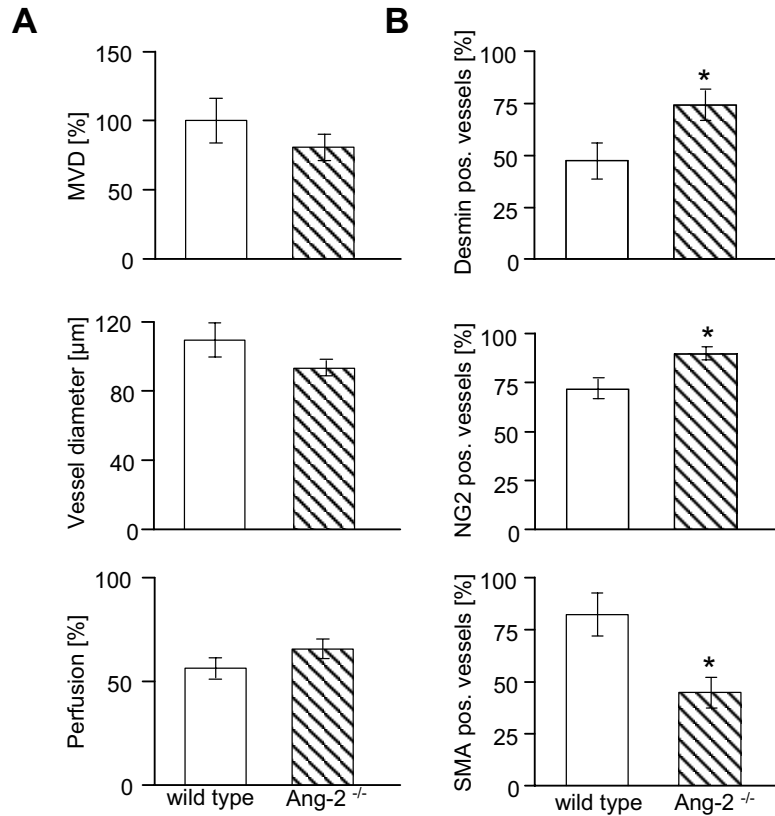

**Supplementary Fig. 3: Effect of Ang-2 deficiency on microvessel density, vessel diameter and perfusion (A) and on mural cell recruitment and maturation (B) in B16F10 melanomas.** B16F10 melanomas were subcutaneously injected in wild type and in Ang-2-deficient mice and harvested when the first tumor had grown to 2 cm<sup>3</sup>. MVDs and vessel diameters were quantitated in CD31-stained tissue sections. Perfusion was assessed on the basis of FITC-lectin perfusion labeling. For mural cell coverage analysis, tumor sections were double-stained for the endothelial cell marker CD31 and for the mural cell markers Desmin (top), NG-2 (middle), and  $\alpha$ -SMA (bottom). Vessel coverage was calculated as the percentage of Desmin-, NG2-, and  $\alpha$ -SMA-positive vessels compared to the number of CD31-positive vessels.
